# Supplementary material
Source: PubMed Central journal article supplement (PMC3466348)
Supplement: NIHMS403214-supplement-01.pdf [file NIHMS403214-supplement-01.pdf]

|              | even                                                                                                                                                                                                                  | slight decrease                                                                                                                                                                                                                     | moderate decrease                                                                                                                                                                                                                     | severe decrease                                                                                                                                                                                                                                                                         |
|--------------|-----------------------------------------------------------------------------------------------------------------------------------------------------------------------------------------------------------------------|-------------------------------------------------------------------------------------------------------------------------------------------------------------------------------------------------------------------------------------|---------------------------------------------------------------------------------------------------------------------------------------------------------------------------------------------------------------------------------------|-----------------------------------------------------------------------------------------------------------------------------------------------------------------------------------------------------------------------------------------------------------------------------------------|
| Premigratory | 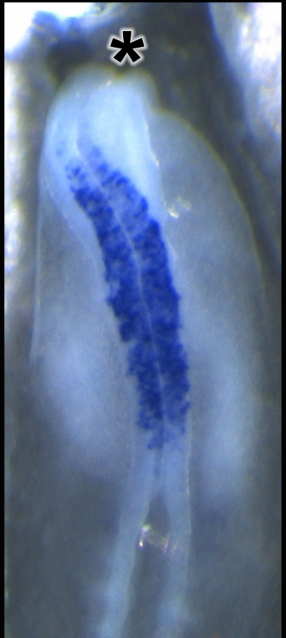 <p>Micrograph showing a premigratory stage with even staining. A black asterisk (*) is located at the top of the dorsal region.</p> |  <p>Micrograph showing a premigratory stage with slight decrease in staining. A black asterisk (*) is located at the top of the dorsal region.</p> |  <p>Micrograph showing a premigratory stage with moderate decrease in staining. A black asterisk (*) is located at the top of the dorsal region.</p> | None                                                                                                                                                                                                                                                                                    |
| Migratory    |  <p>Micrograph showing a migratory stage with even staining. A black asterisk (*) is located at the top of the dorsal region.</p>   |  <p>Micrograph showing a migratory stage with slight decrease in staining. A black asterisk (*) is located at the top of the dorsal region.</p>   |  <p>Micrograph showing a migratory stage with moderate decrease in staining. A black asterisk (*) is located at the top of the dorsal region.</p>   |  <p>Micrograph showing a migratory stage with severe decrease in staining. A black asterisk (*) is located at the top of the dorsal region. A surgical instrument is visible at the bottom left.</p> |
