# Supplementary material
Source: PubMed Central journal article supplement (PMC3466348)

**A**

|             |   |     |   |     |       |   |
|-------------|---|-----|---|-----|-------|---|
| cPald RNA   | + | +   | + | -   | +     | - |
| mmcPald RNA | - | -   | - | +   | -     | - |
| MO          | - | 1mm | - | 1mm | 0.5mm | - |
| control MO  | - | -   | + | -   | -     | - |

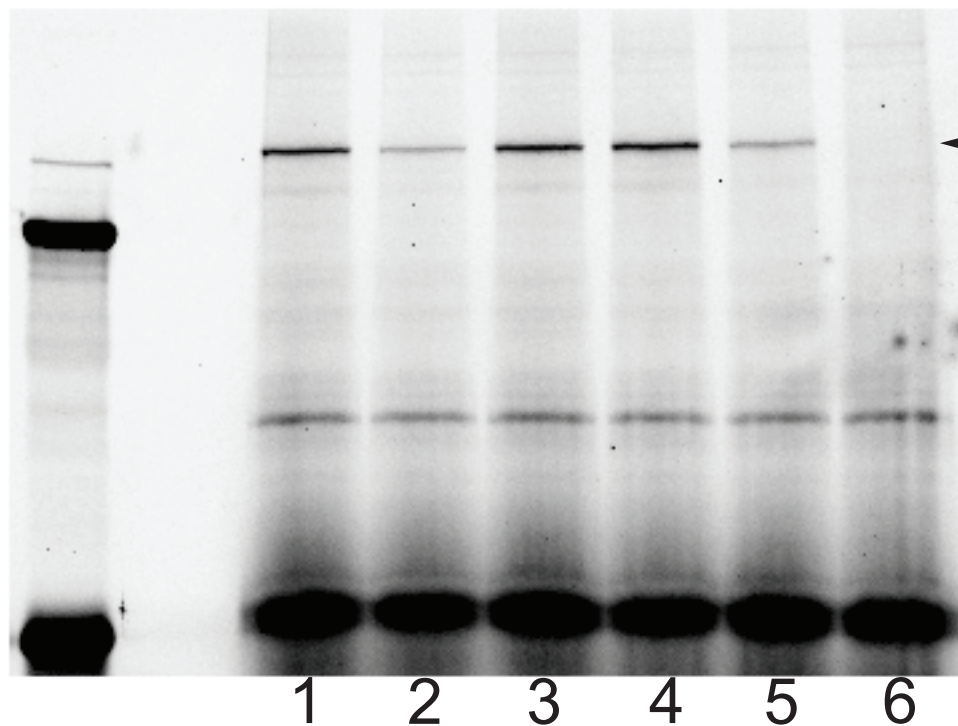

**B**

|  |            |          |            |          |
|--|------------|----------|------------|----------|
|  | mmcPald MO |          | spcPald MO |          |
|  | untargeted | targeted | untargeted | targeted |

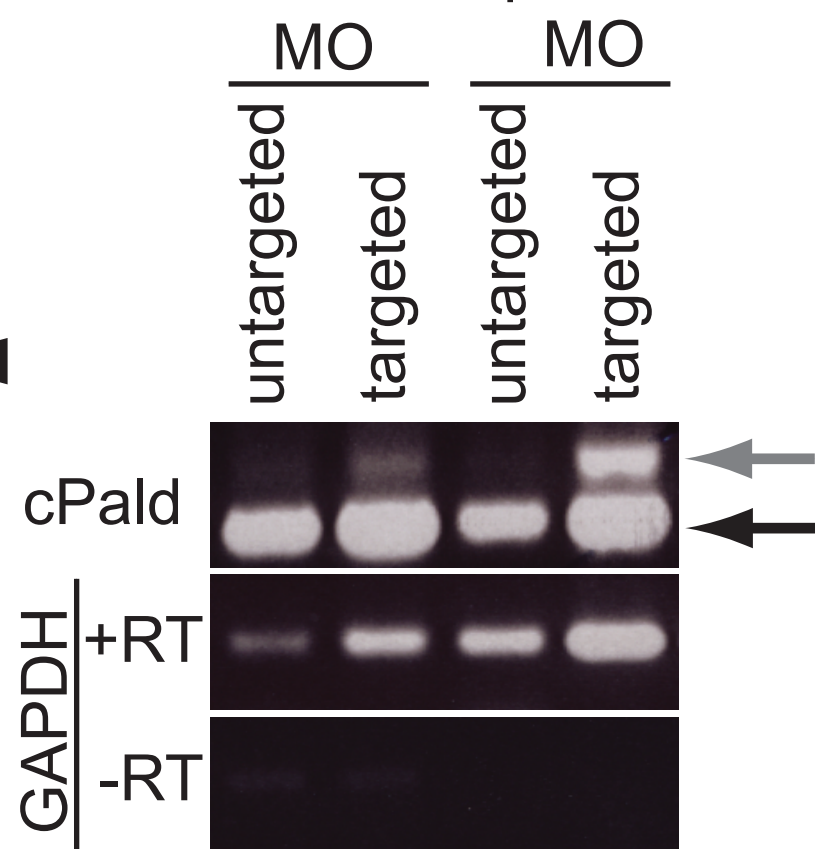

Supplement: NIHMS403214-supplement-02.pdf [file NIHMS403214-supplement-02.pdf]
