# Supplementary material
Source: PubMed Central journal article supplement (PMC3466348)

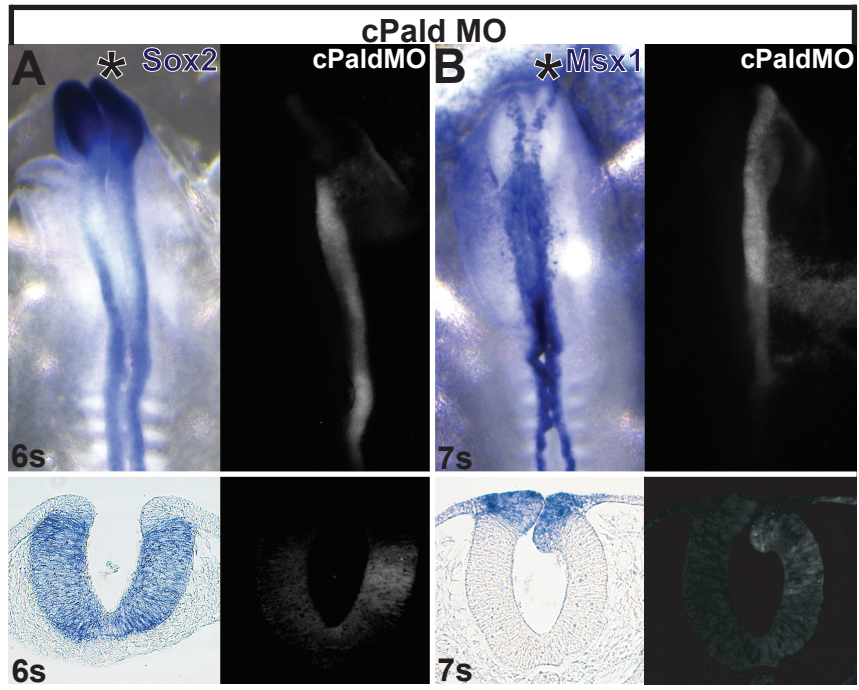

Supplement: NIHMS403214-supplement-03.pdf [file NIHMS403214-supplement-03.pdf]

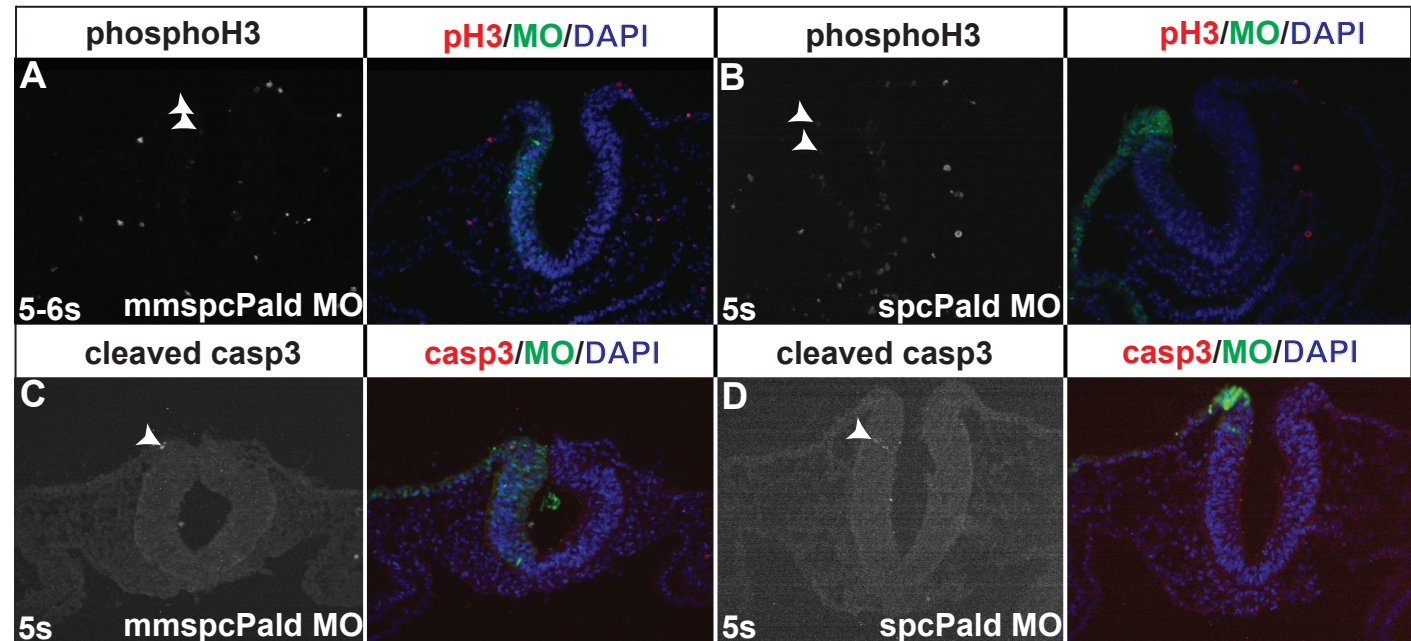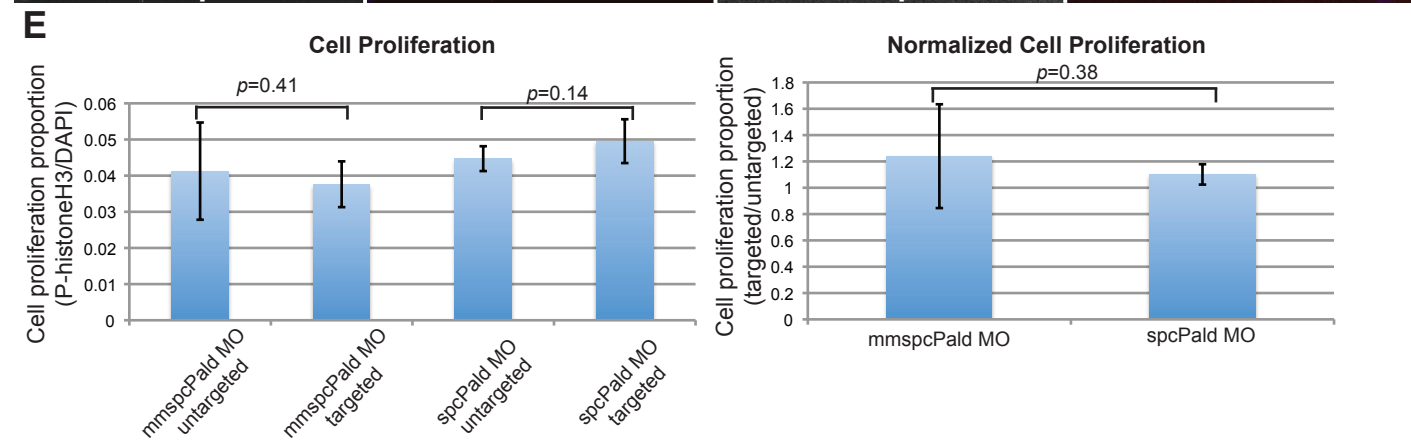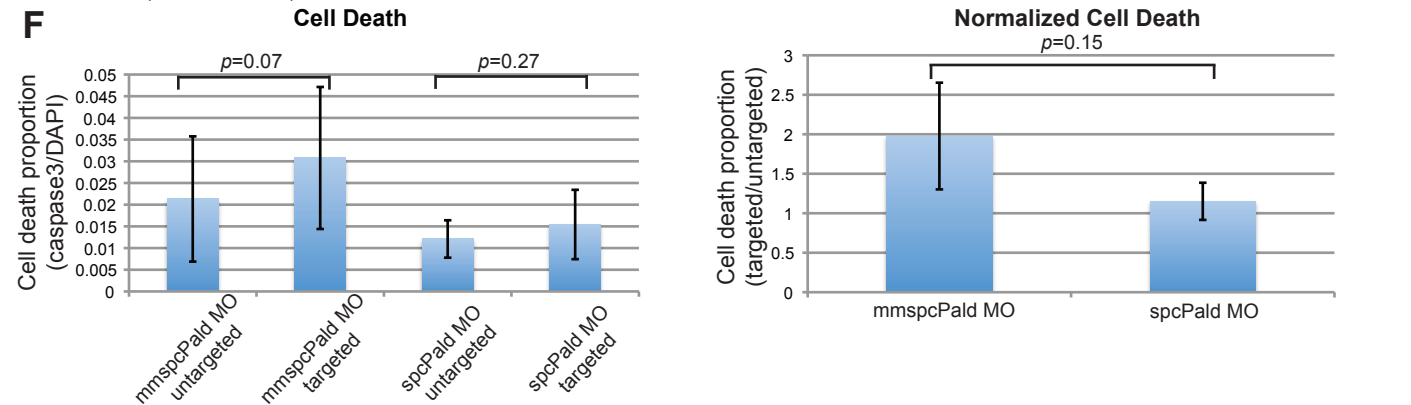

Supplement: NIHMS403214-supplement-04.pdf [file NIHMS403214-supplement-04.pdf]
